# Supplementary material
Source: publisher site journal article supplement (https://www.dovepress.com/article/330448)
Supplement: Supplementary file 1 [file get_supplementary_file.php]

**Palliative Care and Life-Sustaining** **/Local Procedures in Colorectal Cancer in the United States Hospitals: A Ten-Year Perspective**

**Supplementary File 1. ICD-9 and ICD-10 codes used for palliative care and procedures in colorectal cancer**

| Diagnostic categories |  | ICD-9-CM codes | ICD-10-CM codes |
| --- | --- | --- | --- |
| Principal diagnosis | Colorectal Cancer | 153 | C18.0 |
|  |  | 153.1 | C18.1 |
|  |  | 153.2 | C18.2 |
|  |  | 153.3 | C18.3 |
|  |  | 153.4 | C18.4 |
|  |  | 153.5 | C18.5 |
|  |  | 153.6 | C18.6 |
|  |  | 153.7 | C18.7 |
|  |  | 153.8 | C18.8 |
|  |  | 153.9 | C18.9 |
|  |  | 154 | C19 |
|  |  | 154.1 | C20 |
| Palliative care | Encounter for palliative care (Hospice) | V66.7 | Z51.5 |
| Procedure | Type | ICD-9-PCS codes | ICD-10-PCS codes |
| life-sustaining procedures | Intubation, ventilation | 96.01, 96.02, 96.03, 96.04, 96.70, 96.71, 96.72, 93.90 | 5A1935Z, 09HN7BZ, 09HN8BZ, 0CHY7BZ, 0CHY8BZ, 0DH57BZ, 0DH57BZ, 0DH58BZ, 0BH17EZ, 0BH18EZ, 5A1945Z, 5A1955Z,  5A1935Z, 5A1945Z, 5A1955Z, 5A09357, 5A09457, 5A09557 |
|  | Infusion of vasopressor agent,  intravascular pressure  monitoring | 0.17, 00.68 | 3E033XZ, 3E043XZ, 3E043XZ, 3E053XZ, 3E063XZ, 4A033B1 |
|  | Enteral or parenteral infusion of concentrated nutrition | 96.6, 99.15 | 0DH67UZ, 0DH68UZ, 3E0G36Z, 3E0336Z, 3E0436Z, 3E0536Z, 3E0636Z |
|  | Cardiopulmonary resuscitation | 99.60 | 5A12012 |
|  | Blood transfusion | 99.00, 99.01, 99.02, 99.04, 99.05, 99.07, 99.09 | 30233H0, 30233H1, 30233J0, 30233J1, 30233K0, 30233K1, 30233L0, 30233L1, 30233M0, 30233M1, 30233N0, 30233N1, 30233P0, 30233P1, 30233Q0, 30233Q1, 30233R0, 30233R1, 30233T0, 30233T1, 30243H0, 30243H1, 30243J0, 30243J1, 30243K0, 30243K1, 30243L0, 30243L1, 30243M0, 30243M1,  30243N0, 30243N1, 30243P0, 30243P1, 30243Q0, 30243Q1, 30243R0, 30243R1, 30243T0, 30243T1 |
|  | Hemodialysis | 39.95 | 395A1D70Z, 5A1D80Z, 5A1D90Z |
| Local Procedures | Endoscopy | 45.22, 45.23, 45.24, 45.42, 48.36 | 0DBH8ZZ, 0DJD8ZZ, 0DBC8ZZ, 0DBE8ZZ, 0DBF8ZZ, 0DBG8ZZ, 0DBK8ZZ, 0DBL8ZZ, 0DBM8ZZ, 0DBN8ZZ, 0DBP8ZZ, 0W3P8ZZ |
|  | Stent insertion | 46.86, 46.87, 96,22 | 0D7C7DZ, 0D7C8DZ, 0D7E7DZ, 0D7E8DZ, 0D7F7DZ, 0D7F8DZ, 0D7G7DZ, 0D7G8DZ, 0D7H7DZ, 0D7H8DZ, 0D7K7DZ, 0D7K8DZ,  0D7L7DZ, 0D7L8DZ, 0D7M7DZ, 0D7M8DZ, 0D7N7DZ, 0D7N8DZ, 0D7P7DZ, 0D7P8DZ, 0DHE8DZ, 0DHP8DZ, 0DHE7DZ, 0DHP7DZ |
|  | Drainage | 54.91 | 0W9G3ZZ |
| Surgeries | Resection | 17.32, 17.33, 17.34, 17.35, 17.36, 17.39, 45.62, 45.72, 45,73, 45.74, 45.75, 45.76, 45,79, 45.81, 45.82, 48.69 | 0DTC0ZZ, 0DTC4ZZ, 0DTE0ZZ, 0DTE4ZZ, 0DTF0ZZ, 0DTF4ZZ, 0DTG0ZZ, 0DTG4ZZ, 0DTH0ZZ, 0DTH4ZZ, 0DTK0ZZ, 0DTK4ZZ, 0DTL0ZZ, 0DTL4ZZ, 0DTM0ZZ, 0DTM4ZZ, 0DTN0ZZ, 0DTN4ZZ, 0DTP0ZZ, 0DTP4ZZ |
|  | Bypass | 45.92, 45.93, 45.94, 45.95 | 0D180ZK, 0D180ZL, 0D180ZM, 0D180ZN, 0D180ZP, 0D180ZQ, 0D184ZK, 0D184ZL, 0D184ZM, 0D184ZN, 0D184ZP, 0D184ZQ, 0D1B0ZK, 0D1B0ZL, 0D1B0ZN, 0D1B0ZM, 0D1B0ZP, 0D1B0ZQ, 0D1B4ZK, 0D1B4ZL, 0D1B4ZM, 0D1B4ZN, 0D1B4ZP, 0D1B4ZQ, 0D1E0ZE, 0D1E0ZP, 0D1E4ZE, 0D1E4ZP, 0D1H0ZK, 0D1H0ZL, 0D1H0ZM, 0D1H0ZN, 0D1H0ZP, 0D1H4ZK, 0D1H4ZL, 0D1H4ZM, 0D1H4ZN, 0D1H4ZP, 0D1K0ZK, 0D1K0ZL, 0D1K0ZM, 0D1K0ZN, 0D1K0ZP, 0D1K4ZK, 0D1K4ZL, 0D1K4ZM, 0D1K4ZN, 0D1K4ZP, 0D1L0ZL, 0D1L0ZM, 0D1L0ZN, 0D1L0ZP, 0D1L4ZL, 0D1L4ZM, 0D1L4ZN, 0D1L4ZP, 0D1M0ZM, 0D1M0ZN,0D1M0ZP, 0D1M4ZM, 0D1M4ZN, 0D1M4ZP, 0D1N0ZN, 0D1N0ZP, 0D1N4ZN, 0D1N4ZP |
|  | Colostomy creation | 46.10,46.20 | 0D180Z4, 0D1B0Z4, 0D1B4Z4, 0D1E0Z4, 0D1E4Z4, 0D1H0Z4, 0D1K0Z4,  0D1K4Z4, 0D1L0Z4, 0D1L4Z4, 0D1M0Z4, 0D1M4Z4, 0D1N0Z4, 0D1N4Z4 |
